# Supplementary material for: Comparative Analysis of Chloroplast Genome of Meconopsis (Papaveraceae) Provides Insights into Their Genomic Evolution and Adaptation to High Elevation
Source: MDPI journal article supplement (doi:10.3390/ijms25042193), 2024-02-12

*Meconopsis paniculata*  
*Meconopsis horridula*  
*Meconopsis integrifolia*  
*Meconopsis racemosa*  
*Meconopsis henrici*  
*Meconopsis punicea*  
*Meconopsis quintuplinervia*  
*Meconopsis pseudohorridula*  
*Meconopsis simplicifolia*  
*Meconopsis betonicifolia*  
*Meconopsis bella*

➤ gene  
 ■ exon  
 ■ UTR  
 ■ CNS

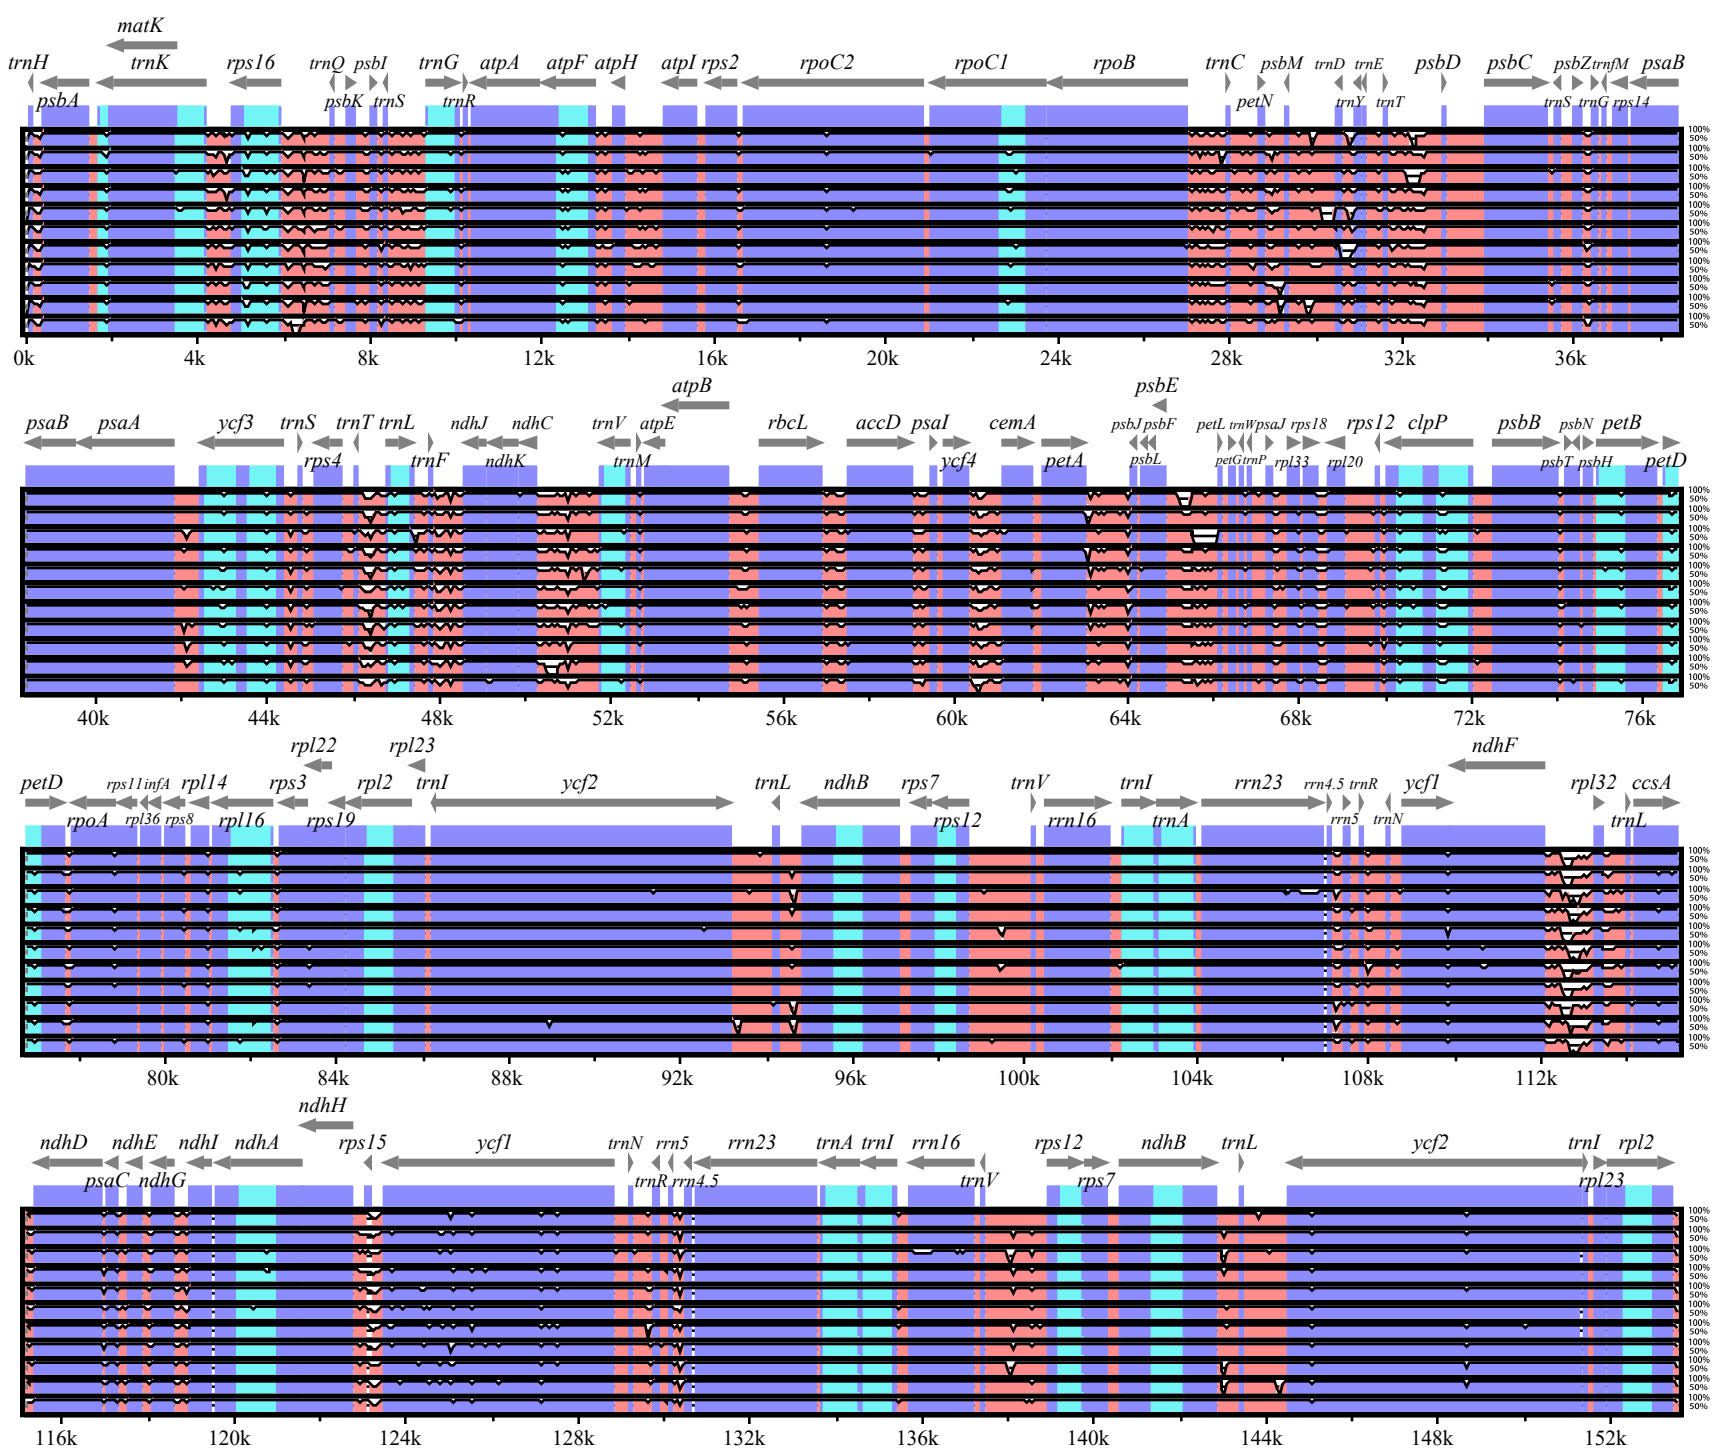

Supplement: s1 [file s1]
